# Supplementary material
Source: ML conference proceedings conference paper supplement (https://proceedings.neurips.cc/paper_files/paper/2021/hash/d14388bb836687ff2b16b7bee6bab182-Abstract.html)
Supplement: Supplementary file 1 [file d14388bb836687ff2b16b7bee6bab182-Supplemental.pdf]

## Appendix

### A Missing proofs from Section 3.1

*Proof of Theorem 3.1.* First, note that for any arm  $a$ , and phase  $t$ , we have  $\hat{\mu}_a^t = \frac{\sum_{s=1}^t M_{sum}(\{r_{a,i}^s\}_{i=1}^m)}{N_a^t}$ , where  $N_a^t = m \cdot t$ .

We define the *clean event*  $C := \left\{ \forall a \in [k], \forall t \in [T] \mid |\hat{\mu}_a^t - \mu_a| \leq I_a^t \right\}$ , where  $I_a^t := \left( \frac{2\sqrt{t}\sigma_{\varepsilon,\delta}}{N_a^t} + \frac{1}{\sqrt{N_a^t}} \right) \cdot \sqrt{2 \log T}$  is a confidence bound interval. We now show that the clean event  $C$  occurs with high probability, that is  $P(C) \geq 1 - 4T^{-2}$ , and after that assume the event  $C$  to simplify our analysis.

Indeed, for each arm  $a$ , we imagine both a reward tape of length  $1 \times T$ , with each cell independently sampled from the distribution  $D_a$  of arm  $a$ , and a private-binary-summation-error tape of length  $1 \times T$ , with each cell independently sampled from the distribution of (the additive) error of the private summation mechanism  $M_{sum}$  for  $m$  users.

We assume that in the  $j$ 'th time a given arm  $a$  is pulled by the algorithm, its reward is taken from the  $j$ 'th cell in this arm's reward tape, and similarly the  $j$ 'th time we compute a private binary sum over rewards of a batch of users who pulled  $a$ , the (additive) error is taken from the  $j$ 'th cell in the arm's private-binary-summation-error tape.<sup>16,17</sup>

Let  $t \in [T]$  and  $a \in [k]$ , and let  $\hat{v}_a^t$  be the approximated reward of arm  $a$  that the algorithm would have held at the end of phase  $t$  using the concrete values in the tapes defined above, that is  $\hat{v}_a^t = \frac{\sum_{s=1}^t d_s + \sum_{i=1}^{N_a^t} e_i}{N_a^t}$ , where  $d_s$  is the  $s$ 'th cell of the private-binary-summation-error tape of  $a$ , and the  $\{e_i\}_{i=1}^{N_a^t}$  are the total  $N_a^t = m \cdot t$  cells of the reward tape of  $a$  that we have used until the end of the  $t$ 'th phase.

Our aim is to bound the term  $|\hat{v}_a^t - \mu_a| = \frac{\sum_{s=1}^t d_s + \sum_{i=1}^{N_a^t} (e_i - \mu_a)}{N_a^t}$ . We first bound the first sum in the nominator, then bound the second sum in the nominator, and finally combine the bounds to get a bound for  $|\hat{v}_a^t - \mu_a|$ .

To bound the  $d_s$ 's sum, we apply Hoeffding's inequality (Lemma 2.1) for a sum of  $n \leftarrow t$  random variables which are sub-Gaussian with variance  $\sigma_{\varepsilon,\delta}^2$  and have zero mean (since  $M_{sum}$  is unbiased) to get,

$$P \left( \left| \sum_{s=1}^t d_s \right| \leq 2\sigma_{\varepsilon,\delta} \cdot \sqrt{2t \log T} \right) \geq 1 - 2 \exp \left( - \left( 4\sigma_{\varepsilon,\delta}^2 \cdot 2t \log T \right) / \left( 2t\sigma_{\varepsilon,\delta}^2 \right) \right) \\ = 1 - 2T^{-4}. \quad (1)$$

To bound the  $f_i = (e_i - \mu_a)$ 's sum, we apply Hoeffding's inequality (Lemma 2.1) for the sum of  $n \leftarrow N_a^t$  random variables  $f_i$ , each sub-Gaussian with variance  $1/4$  (since it is bounded in the interval  $[-\mu_a, 1 - \mu_a]$  of size 1), and with zero mean (since by its definition  $\mathbb{E}[e_i - \mu_a] = \mathbb{E}[e_i] - \mu_a = 0$ ), to get that

$$P \left( \left| \sum_{i=1}^{N_a^t} (e_i - \mu_a) \right| \leq \sqrt{2N_a^t \log T} \right) \geq 1 - 2 \exp \left( - (2N_a^t \log T) / (2N_a^t / 4) \right) = 1 - 2T^{-4}. \quad (2)$$

<sup>16</sup>Here we rely on the fact that the distribution of the error of  $M_{sum}$  is independent of the input.

<sup>17</sup>Note that sizes of both tapes have been chosen conservatively to be of size  $T$ . We never pass the end of any these tapes, since there are at most  $T$  users in total, and at most  $T$  batches (actually roughly  $T/m$  in this case), and we may not use them all.

Applying a union bound and the triangle inequality on Equation (1) and Equation (2) gives that

$$P\left(\left|\sum_{s=1}^t d_s + \sum_{i=1}^{N_a^t} (e_i - \mu_a)\right| \leq \left(2\sqrt{t}\sigma_{\varepsilon,\delta} + \sqrt{N_a^t}\right) \cdot \sqrt{2\log T}\right) \geq 1 - 4T^{-4},$$

which by the definition of  $\hat{v}_a^t$  and  $I_a^t$  means that

$$P\left(|\hat{v}_a^t - \mu_a| \leq I_a^t\right) \geq 1 - 4T^{-4}. \quad (3)$$

Since in the analysis above  $t$  and  $a$  are arbitrary, Equation (3) holds for every  $t \in [T]$  and  $a \in [k]$ . Thus, we take a union bound over all arms  $a \in [k]$  (assuming  $k \leq T$ ) and all  $t \in [T]$ , to conclude that

$$P\left(\forall a \in [k], \forall t \in [T] \left|\hat{v}_a^t - \mu_a\right| \leq I_a^t\right) \geq 1 - 4T^{-2}. \quad (4)$$

Since the event in the probability above in Equation (4) is precisely the event that  $C$  holds for a run of the algorithm using the randomness in the tapes as defined above (by the definitions of  $\hat{v}_a^t$  and  $\hat{\mu}_a^t$ ), we get that

$$P(C) \geq 1 - 4T^{-2}.$$

For the regret analysis, we assume the clean event  $C$ . Consider a suboptimal arm  $a$  such that  $\Delta_a = \mu^* - \mu_a > 0$ , and consider the last phase  $t_0$  following which we did not remove the arm  $a$  yet (or the last phase if  $a$  remains active to the end). Since we assumed the clean event, an optimal arm  $a^*$  cannot be disqualified, and since  $a$  is not yet disqualified, the confidence intervals of the arms  $a$  and  $a^*$  at the end of the  $t_0$ 's phase must overlap. Therefore,

$$\Delta_a = \mu^* - \mu_a \leq 2(I_a^{t_0} + I_{a^*}^{t_0}) = 4I_a^{t_0} = \left(\frac{8\sqrt{t_0}\sigma_{\varepsilon,\delta}}{N_a^{t_0}} + \frac{4}{\sqrt{N_a^{t_0}}}\right) \cdot \sqrt{2\log T}, \quad (5)$$

where the third step follows since  $a$  and  $a^*$  were sampled using identical batch sizes throughout the algorithm, so at the end of the  $t_0$ 'th phase,  $N_a^{t_0} = N_{a^*}^{t_0}$  and therefore  $I_a^{t_0} = I_{a^*}^{t_0}$ , and the last step follows by the definition of  $I_a^{t_0}$ .

Observe that if  $N_a^{t_0} > \frac{128\log T}{\Delta_a^2}$  then  $\frac{4\sqrt{2\log T}}{\sqrt{N_a^{t_0}}} < \frac{\Delta_a}{2}$ , and if  $N_a^{t_0} > \frac{(16\sigma_{\varepsilon,\delta}\sqrt{2\log T})^2}{m\Delta_a^2}$  then  $\frac{8\sqrt{t_0}\sigma_{\varepsilon,\delta}\sqrt{2\log T}}{N_a^{t_0}} = \frac{8\sqrt{N_a^{t_0}/m}\sigma_{\varepsilon,\delta}\sqrt{2\log T}}{N_a^{t_0}} = \frac{8\sigma_{\varepsilon,\delta}\sqrt{2\log T}}{\sqrt{mN_a^{t_0}}} < 8\sigma_{\varepsilon,\delta}\sqrt{2\log T} \cdot \frac{\Delta_a}{16\sigma_{\varepsilon,\delta}\sqrt{2\log T}} = \frac{\Delta_a}{2}$ , so their sum is  $< \Delta_a$  in contradiction to Equation (5). Hence,  $N_a^{t_0} \leq \max\left(\frac{128\log T}{\Delta_a^2}, \frac{512\sigma_{\varepsilon,\delta}^2 \cdot \log T}{m\Delta_a^2}\right)$ .

Therefore the total regret on arm  $a$  is

$$\begin{aligned} R_a &\leq \Delta_a \cdot (N_a^{t_0} + m) \leq \max\left(\frac{128\log T}{\Delta_a}, \frac{512\sigma_{\varepsilon,\delta}^2 \cdot \log T}{m\Delta_a}\right) + m\Delta_a \\ &\leq \frac{128\log T}{\Delta_a} + \frac{512\sigma_{\varepsilon,\delta}^2 \cdot \log T}{m\Delta_a} + m\Delta_a, \end{aligned} \quad (6)$$

where the first step follows since since the arm  $a$  is eliminated following phase  $t_0 + 1$  (or if  $t_0$  is the last phase, then we finish and don't sample  $a$  after it) of batch size  $m$  and is subsequently never pulled, and the second step follows by previous bound on  $N_a^{t_0}$  and since  $N_a^{t_0+1} = N_a^{t_0} + m$ . We sum up the regret over all arms, to obtain a bound for the total regret denoted by  $R$ :

$$R = \sum_{a \in [k]: \Delta_a > 0} R_a \leq \sum_{a \in [k]: \Delta_a > 0} \left(\frac{128\log T}{\Delta_a} + \frac{512\sigma_{\varepsilon,\delta}^2 \cdot \log T}{m\Delta_a} + m\Delta_a\right).$$

To complete the analysis, we argue that the bad event in which  $C$  does not hold contributes a negligible amount to the expected regret  $R(T)$ . Indeed,

$$\begin{aligned}
R(T) &= \mathbb{E} [R \mid C] \cdot P(C) + \mathbb{E} [R \mid \bar{C}] \cdot P(\bar{C}) \\
&\leq \sum_{a \in [k]: \Delta_a > 0} \left( \frac{128 \log T}{\Delta_a} + \frac{512 \sigma_{\varepsilon, \delta}^2 \cdot \log T}{m \Delta_a} + m \Delta_a \right) + T \cdot 4T^{-2} \\
&= O \left( \sum_{a \in [k]: \Delta_a > 0} \left( \frac{\log T}{\Delta_a} + \frac{\sigma_{\varepsilon, \delta}^2 \log T}{m \Delta_a} + m \Delta_a \right) \right), \tag{7}
\end{aligned}$$

where the first step follows by the law of total expectation, and the second step follows since the regret is at most  $T$ , and by the previous bound on  $P(C)$ .

Now for the distribution-independent bound, assume the clean even  $C$ , and let  $\gamma > 0$  be a threshold whose exact value we will set later. We group the arms  $a$  based on if  $\Delta_a < \gamma$  or not, to get

$$\begin{aligned}
R &= \sum_{a \in [k]: \Delta_a < \gamma} R_a + \sum_{a \in [k]: \Delta_a \geq \gamma} R_a \\
&\leq T \cdot \gamma + \sum_{a \in [k]: \Delta_a \geq \gamma} \left( \frac{128 \log T}{\Delta_a} + \frac{512 \sigma_{\varepsilon, \delta}^2 \cdot \log T}{m \Delta_a} + m \Delta_a \right) \\
&\leq T \cdot \gamma + \frac{(128 + 512 \sigma_{\varepsilon, \delta}^2 / m) k \log T}{\gamma} + mk,
\end{aligned}$$

where the first step follows from splitting the regret from before to two sums, the second step follows since in the first sum  $\Delta_a < \gamma$  and since there are only  $T$  samples in total throughout all arms, and in the second sum we apply Equation (6), and the final step follows since there are  $k$  arms in total and since the elements in the sum satisfy  $\Delta_a \in [\gamma, 1]$ .

We balance the first two terms by defining  $\gamma$  to be  $\gamma = \sqrt{\frac{(128 + 512 \sigma_{\varepsilon, \delta}^2 / m) k \log T}{T}}$ , so the total regret is:  $R \leq 2\sqrt{(128 + 512 \sigma_{\varepsilon, \delta}^2 / m) k \cdot T \log T} + mk$ . By a similar argument to Equation (7) conditioning on whether or not  $C$  occurred, we get that the expected regret  $R(T)$  satisfies

$$R(T) \leq 2\sqrt{(128 + 512 \sigma_{\varepsilon, \delta}^2 / m) k \cdot T \log T} + mk + T \cdot 4T^{-2} = O \left( \sqrt{\left( 1 + \frac{\sigma_{\varepsilon, \delta}^2}{m} \right) k T \log T} + mk \right).$$

□

## B Missing proofs from Section 3.2

*Proof of Theorem 3.3.* We continue identically to the proof of Theorem 3.1, except the fact that we need the  $t$ 'th index of each arm's private-binary-summation-error tape to contain an iid sample of the error of the private binary summation mechanism  $M_{sum}$  for  $m^t = 2^t$  users. By the definition of  $M_{sum}$ , which is sub-Gaussian with the same variance for any number of users (batch size), the application of Hoeffding inequality as in the proof of Theorem 3.1 still follows. We conclude that

the *clean event*  $C := \left\{ \forall a \in [k], \forall t \in [T] \mid \hat{\mu}_a^t - \mu_a \leq I_a^t \right\}$ , where  $I_a^t := \left( \frac{2\sqrt{t}\sigma_{\varepsilon, \delta}}{N_a^t} + \frac{1}{\sqrt{N_a^t}} \right) \cdot \sqrt{2 \log T}$  occurs with high probability, that is  $P(C) \geq 1 - 4T^{-2}$ .

For the regret analysis, we assume the clean event  $C$ . Let  $a$  be a suboptimal arm, and let  $t_0$  be the last phase following which we did not remove the arm  $a$  yet (or the last phase if  $a$  remains active to the end). As in the proof of Theorem 3.1, we get that

$$\Delta_a \leq \left( \frac{8\sqrt{t_0}\sigma_{\varepsilon, \delta}}{N_a^{t_0}} + \frac{4}{\sqrt{N_a^{t_0}}} \right) \cdot \sqrt{2 \log T}. \tag{8}$$

We now diverge from the proof of Theorem 3.1.

Observe that if both  $N_a^{t_0} > \frac{128 \log T}{\Delta_a^2}$  and  $N_a^{t_0} > \frac{16\sqrt{t_0}\sigma_{\varepsilon,\delta}\sqrt{2\log T}}{\Delta_a}$ , then we get a contradiction to Equation (8) since  $\frac{4\sqrt{2\log T}}{\sqrt{N_a^{t_0}}} < \frac{\Delta_a}{2}$  and  $\frac{8\sqrt{t_0}\sigma_{\varepsilon,\delta}\sqrt{2\log T}}{N_a^{t_0}} < \frac{\Delta_a}{2}$  respectively. Hence,  $N_a^{t_0} \leq \max\left(\frac{128 \log T}{\Delta_a^2}, \frac{16\sqrt{t_0}\sigma_{\varepsilon,\delta}\sqrt{2\log T}}{\Delta_a}\right)$ . Therefore the total regret on arm  $a$  is

$$\begin{aligned} R_a &\leq 4\Delta_a N_a^{t_0} \leq \max\left(\frac{512 \log T}{\Delta_a}, 64\sqrt{t_0}\sigma_{\varepsilon,\delta} \cdot \sqrt{2\log T}\right) \\ &\leq \frac{512 \log T}{\Delta_a} + 64\sqrt{2}\sigma_{\varepsilon,\delta} \cdot \log T, \end{aligned} \quad (9)$$

where the first step follows since arm  $a$  is eliminated following phase  $t_0 + 1$  (or if  $t_0$  is the last phase, then we finish and don't sample  $a$  after it) with batch size  $2^{t_0+1} = 2 \cdot 2^{t_0} \leq 3 \cdot N_a^{t_0}$ , and the third step follows since  $m^{t_0} = 2^{t_0}$  and  $t_0 \geq 1$ , so  $T \geq N_a^t = \sum_{s=1}^{t_0} m^s = 2^{t_0+1} - 2 \geq 2^{t_0}$  and therefore  $t_0 \leq \log T$ .

Similarly to the proof of Theorem 3.1 which uses Equation (6) to get the distribution-dependent bound, here we use the analogous Equation (9) to conclude that the distribution-dependent bound is

$$R(T) = O\left(\sum_{a \in [k]: \Delta_a > 0} \left(\frac{\log T}{\Delta_a} + \sigma_{\varepsilon,\delta} \log T\right)\right) = O\left(\left(\sum_{a \in [k]: \Delta_a > 0} \frac{\log T}{\Delta_a}\right) + k\sigma_{\varepsilon,\delta} \log T\right).$$

Now for the distribution-independent bound, similarly to the proof of Theorem 3.1, assuming the clean event  $C$ , for any  $\gamma > 0$  it holds that the total regret

$$R \leq T \cdot \gamma + \frac{512k \log T}{\gamma} + 64\sqrt{2}k\sigma_{\varepsilon,\delta} \cdot \log T,$$

and specifically for  $\gamma = \sqrt{\frac{512k \log T}{T}}$ , the total regret  $R \leq \sqrt{2048k \cdot T \log T} + 64\sqrt{2}k\sigma_{\varepsilon,\delta} \cdot \log T$ . Similarly to the argument in Equation (7), conditioning on whether the clean event  $C$  occurred or not, we conclude that the expected regret  $R(T)$  satisfies

$$R(T) \leq \sqrt{2048k \cdot T \log T} + 64\sqrt{2}k\sigma_{\varepsilon,\delta} \cdot \log T + T \cdot 4T^{-2} = O\left(\sqrt{kT \log T} + k\sigma_{\varepsilon,\delta} \log T\right).$$

□

## C Private binary summation mechanism for the shuffle model

In this section, for any  $\varepsilon, \delta \in (0, 1)$  and number of users, we give an  $(\varepsilon, \delta)$ -SDP private binary summation mechanism for the shuffle model, with an (additive) error distribution which is unbiased and sub-Gaussian with variance  $\sigma_{\varepsilon,\delta}^2 = O\left(\frac{\log(1/\delta)}{\varepsilon^2}\right)$ , and which does not depend on the input.

Consider a group of  $m$  users, each with a binary value  $x_i \in \{0, 1\}$ , and the target is to calculate the sum  $\sum_{i=1}^m x_i$ . Our mechanism splits to two different internal mechanisms based on whether  $m$  is “small” or “large”. Intuitively, to ensure that we add noise which is roughly  $\frac{1}{\varepsilon}$ , when we have less

than roughly  $\frac{1}{\varepsilon^2}$  users, each one adds several bits of noise, and when we have more than roughly  $\frac{1}{\varepsilon^2}$  users, each one adds a single bit of noise with some bias. This mechanism is summarized below:

---

**Algorithm 3:**  $(\varepsilon, \delta)$ -SDP binary summation mechanism for  $m$  users

---

```

1  $\tau \leftarrow \frac{96 \log(2/\delta)}{\varepsilon^2};$ 
2
3 // Local Randomizer
4 Function  $E(x)$ :
5   if  $m \leq \tau$  then
6     return  $(x, y_1, \dots, y_p)$  where  $\{y_j\}_{j=1}^p$  are iid  $y_j \sim \text{Bernoulli}(1/2)$ , and  $p = \lceil \frac{\tau}{m} \rceil$ ;
7   else
8     return  $(x, y)$  where  $y \sim \text{Bernoulli}(\frac{\tau}{2m})$ ;
9   end
10
11 // Analyzer
12 Function  $A(z_1, \dots, z_n)$ :
13   if  $m \leq \tau$  then
14     return  $\sum_{j=1}^n z_j - \lceil \frac{\tau}{m} \rceil \cdot m/2$ ;
15   else
16     return  $\sum_{j=1}^n z_j - \tau/2$ ;
17   end

```

---

**Theorem C.1.** For any  $m \in \mathbb{N}$ ,  $\varepsilon < 1$  and  $\delta > 0$ , Algorithm 3 is  $(\varepsilon, \delta)$ -SDP, unbiased, and has an error distribution which is sub-Gaussian with variance  $\sigma_{\varepsilon, \delta}^2 = O\left(\frac{\log(1/\delta)}{\varepsilon^2}\right)$  and independent of the input.

*Proof.* We first prove that the mechanism is  $(\varepsilon, \delta)$ -SDP, and then prove the other claims.

Indeed, consider two neighboring inputs  $X = (0, x_2, \dots, x_m)$  and  $X' = (1, x_2, \dots, x_m)$ . To ease on the analysis, we define the random variable  $B$  to be the sum of all the random bits (i.e.,  $y$  or  $y_1, \dots, y_p$  depending on  $m$ ) over all users in  $X$ . We define  $B'$  identically with respect to  $X'$ .

We first claim that the sum  $M^*(X) = B + \sum_{j=1}^m x_j$  of the shuffled reported bits is  $(\varepsilon, \delta)$ -DP.

Since  $B$  is binomial in both regimes, by Chernoff bounds as in Theorem E.1 in Cheu et al. [9], for any  $\delta > 0$  it holds that  $P\left(|B - \mathbb{E}[B]| \geq \sqrt{3 \mathbb{E}[B] \log \frac{2}{\delta}}\right) < \delta$ . Therefore, define  $I_c = \left(\mathbb{E}[B] - \sqrt{3 \mathbb{E}[B] \log \frac{2}{\delta}}, \mathbb{E}[B] + \sqrt{3 \mathbb{E}[B] \log \frac{2}{\delta}}\right)$ , and we get that  $P(B \notin I_c) \leq \delta$  (and similarly for  $B'$ ).

To show that  $\frac{P(B=t)}{P(B'=t-1)} \leq e^\varepsilon$  for any  $t \in I_c$ , we split to the two regimes of  $m$ : the small  $m \leq \tau$  regime, and the large  $m > \tau$  regime.

**Small  $m \leq \tau$ :** In this case,  $B \sim \text{Binomial}(\lceil \frac{\tau}{m} \rceil \cdot m, 1/2)$ , so  $\mathbb{E}[B] = \lceil \frac{\tau}{m} \rceil \cdot m/2$ . For any  $t \in I_c$ , it holds that

$$\begin{aligned}
\frac{P(B=t)}{P(B'=t-1)} &= \frac{2\mathbb{E}[B] - t + 1}{t} \leq \frac{\mathbb{E}[B] + \sqrt{3 \mathbb{E}[B] \log \frac{2}{\delta}} + 1}{\mathbb{E}[B] - \sqrt{3 \mathbb{E}[B] \log \frac{2}{\delta}}} \\
&\leq \frac{\tau/2 + \sqrt{\tau/2 \cdot 3 \log \frac{2}{\delta}} + 1}{\tau/2 - \sqrt{\tau/2 \cdot 3 \log \frac{2}{\delta}}} = \frac{1 + \sqrt{6 \log \frac{2}{\delta}}/\tau + 2/\tau}{1 - \sqrt{6 \log \frac{2}{\delta}}/\tau} \\
&= \frac{1 + \varepsilon/4 + 2/\tau}{1 - \varepsilon/4} \leq \frac{1 + \varepsilon/4 + \frac{\varepsilon}{4}}{1 - \varepsilon/4} = \frac{1 + \varepsilon/2}{1 - \varepsilon/4} \leq e^\varepsilon, \tag{10}
\end{aligned}$$

where the first step follows since  $B, B'$  are iid binomial with  $\lceil \frac{\tau}{m} \rceil \cdot m = 2 \mathbb{E}[B]$  trials of success probability  $1/2$ , the second step follows since  $t \in I_c \Rightarrow t \geq \mathbb{E}[B] - \sqrt{3 \mathbb{E}[B] \log \frac{2}{\delta}}$  (which is non-negative) and since  $\frac{2 \mathbb{E}[B] + 1 - t}{t}$  is a decreasing function of  $t$  for  $t \geq 0$ , the third step follows since  $\frac{x + \sqrt{ax+1}}{x - \sqrt{ax}}$  is a decreasing function of  $x$  for  $x > a$ , where we take  $a = 3 \log \frac{2}{\delta}$  and  $x = \mathbb{E}[B] \geq \tau/2 > a$ , the fourth step follows by dividing the nominator and the denominator by  $\tau/2$ , the fifth step follows by the definition of  $\tau$ , the sixth step follows since  $\varepsilon < 1$  so  $\tau \geq 8/\varepsilon$ , and the last step follows since  $\frac{1+x/2}{1-x/4} \leq e^x$  for any  $x \in [0, 1]$ . This concludes the case  $m \leq \tau$ .

**Large  $m > \tau$ :** In this case,  $B \sim \text{Binomial}(m, \frac{\tau}{2m})$ , so  $\mathbb{E}[B] = \tau/2$ . For any  $t \in I_c$ , it holds that

$$\begin{aligned}
\frac{P(B=t)}{P(B'=t-1)} &= \frac{m-t+1}{t} \cdot \frac{\frac{\tau}{2m}}{1 - \frac{\tau}{2m}} \leq \frac{m - \tau/2 + \sqrt{\frac{3}{2} \tau \log \frac{2}{\delta}} + 1}{\tau/2 - \sqrt{\frac{3}{2} \tau \log \frac{2}{\delta}}} \cdot \frac{\frac{\tau}{2m}}{1 - \frac{\tau}{2m}} \\
&= \frac{m - \tau/2 + \sqrt{\frac{3}{2} \tau \log \frac{2}{\delta}} + 1}{\tau/2 - \sqrt{\frac{3}{2} \tau \log \frac{2}{\delta}}} \cdot \frac{\tau/2}{m - \tau/2} \\
&= \frac{m - \tau/2 + \sqrt{\frac{3}{2} \tau \log \frac{2}{\delta}} + 1}{m - \tau/2} \cdot \frac{\tau/2}{\tau/2 - \sqrt{\frac{3}{2} \tau \log \frac{2}{\delta}}} \\
&= \left( 1 + \frac{\sqrt{\frac{3}{2} \tau \log \frac{2}{\delta}} + 1}{m - \tau/2} \right) \cdot \frac{1}{1 - \sqrt{6 \log \frac{2}{\delta} / \tau}} \\
&\leq \left( 1 + \sqrt{6 \log \frac{2}{\delta} / \tau} + 2/\tau \right) \cdot \frac{1}{1 - \sqrt{6 \log \frac{2}{\delta} / \tau}} \\
&= \frac{1 + \varepsilon/4 + 2/\tau}{1 - \varepsilon/4} \leq \frac{1 + \varepsilon/4 + \varepsilon/4}{1 - \varepsilon/4} \leq e^\varepsilon, \tag{11}
\end{aligned}$$

where the first step follows since  $B, B'$  are iid binomial with  $m$  trials of success probability  $\frac{\tau}{2m}$ , the second step follows since  $t \in I_c \Rightarrow t \geq \mathbb{E}[B] - \sqrt{3 \mathbb{E}[B] \log \frac{2}{\delta}} = \tau/2 - \sqrt{\frac{3}{2} \tau \log \frac{2}{\delta}}$  (which is non-negative) and since  $\frac{m+1-t}{t}$  is a decreasing function of  $t$  for  $t \geq 0$ , the sixth step follows since  $m - \tau/2 \geq \tau - \tau/2 = \tau/2$ , the seventh step follows by the definition of  $\tau$ , the eighth step follows since  $\varepsilon < 1$  so  $\tau \geq 8/\varepsilon^2 \geq 8/\varepsilon$ , and the last step follows since  $\frac{1+x/2}{1-x/4} \leq e^x$  for any  $x \in [0, 1]$ . This concludes the case  $m > \tau$ .

We therefore conclude that in both regimes of  $m$ ,

$$\forall t \in I_c, \frac{P(B=t)}{P(B'=t-1)} \leq e^\varepsilon. \tag{12}$$

A dual argument shows that  $\frac{P(B=t)}{P(B'=t-1)} \geq e^{-\varepsilon}$  using the fact that  $t \in I_c$  so  $t \leq \mathbb{E}[B] + \sqrt{3 \mathbb{E}[B] \log \frac{2}{\delta}}$  and substituting in the value of  $\mathbb{E}[B]$  as in the cases above.

We define  $k = \sum_{j=2}^m x_j$  to be the true sum of the bits of  $X$ , and the true sum of the bits of  $X'$  minus one. Therefore, for any  $F \subseteq \mathbb{N}$  it holds that

$$\begin{aligned}
P(M^*(X) \in F) &= P(M^*(X) \in F \wedge B \in I_c) + P(M^*(X) \in F \wedge B \notin I_c) \\
&\leq P(M^*(X) \in F \wedge B \in I_c) + P(B \notin I_c) \\
&\leq P(M^*(X) \in F \wedge B \in I_c) + \delta
\end{aligned}$$

$$\begin{aligned}
&= \delta + \sum_{s \in F} P(M^*(X) = s \wedge B \in I_c) \\
&= \delta + \sum_{s \in F} P(B = s - k \wedge B \in I_c) \\
&= \delta + \sum_{s \in F} P(B = s - k \wedge s - k \in I_c) \\
&\leq \delta + \sum_{s \in F} e^\varepsilon \cdot P(B' = s - k - 1 \wedge s - k \in I_c) \\
&= \delta + e^\varepsilon \cdot \sum_{s \in F} P(M^*(X') = s \wedge s - k \in I_c) \\
&\leq \delta + e^\varepsilon \cdot \sum_{s \in F} P(M^*(X') = s) \\
&= \delta + e^\varepsilon \cdot P(M^*(X') \in F),
\end{aligned}$$

where the first step follows by the law of total probability, the third step follows since  $P(B \notin I_c) \leq \delta$ , the fourth step follows by the law of total probability, the fifth step follows by the definition of  $M^*(X) = k + B$ , the seventh step follows by substituting  $t \leftarrow s - k \in I_c$  into Equation (12), and the eighth step follows by the definition of  $M^*(X') = k + 1 + B'$ . A similar dual argument uses the fact that  $\forall t \in I_c, \frac{P(B=t)}{P(B'=t-1)} \geq e^{-\varepsilon}$  to show that  $P(M^*(X') \in F) \leq \delta + e^\varepsilon P(M^*(X) \in F)$ , and we conclude that  $M^*$  is  $(\varepsilon, \delta)$ -DP.

To see that  $M$  is  $(\varepsilon, \delta)$ -SDP, note that in our mechanism  $M(X)$ , given the number of users  $m$ , the total number of bits  $U$  that the server receives is constant. Therefore, the shuffler's output is a random permutation of its input, which is of constant size. Thus, the shuffler's output's distribution is identical to the output distribution of the mechanism which first selects the number  $s$  of ones in the shuffler's input where  $s \sim M^*(X)$ , and then post-processes the output  $s$  by outputting a randomly shuffled binary vector with  $s$  ones, and  $U - s$  zeros. Since we have shown that  $M^*$  is  $(\varepsilon, \delta)$ -DP, by post-processing arguments we conclude the shuffler's output is  $(\varepsilon, \delta)$ -DP, so  $M$  is  $(\varepsilon, \delta)$ -SDP.

Now for the other claims, first recall that in both regimes of  $m$ , the output of the mechanism is of the form  $z = B + \sum_{j=1}^m x_j - \mathbb{E}[B]$  where  $B$  is the only source of randomness in the mechanism.

Therefore, the mechanism is unbiased since  $\mathbb{E}\left[z - \sum_{j=1}^m x_j\right] = \mathbb{E}[B - \mathbb{E}[B]] = 0$ . In addition, the (additive) error of the mechanism which is precisely  $B - \mathbb{E}[B]$ , is obviously independent of the input  $\{x_i\}_{i=1}^m$ , and only depends on the natural parameters of the problem.

Finally, to see that the mechanism's additive error is sub-Gaussian with variance  $O\left(\frac{\log(1/\delta)}{\varepsilon^2}\right)$ , it suffices to show that  $B$  is sub-Gaussian with variance  $O\left(\frac{\log(1/\delta)}{\varepsilon^2}\right)$ , since  $B$  is the additive error shifted by a constant (this constant is  $\mathbb{E}[B]$  and adding constants does not change the sub-Gaussian variance).

Indeed, recall that in both cases  $B$  is binomial, where in the small  $m \leq \tau$  case  $\mathbb{E}[B] = \lceil \frac{\tau}{m} \rceil \cdot m/2 \leq (\tau + m)/2 \leq (\tau + \tau)/2 = \tau$ , and in the large  $m > \tau$  case  $\mathbb{E}[B] = \tau/2 \leq \tau$  as well. Therefore, by Chernoff bounds as in Theorem E.1 in Cheu et al. [9], we get that for any  $t > 0$ ,  $P(B - \mathbb{E}[B] \leq t) < \exp\left(\frac{-t^2}{3\mathbb{E}[B]}\right) \leq \exp\left(\frac{-t^2}{3\tau}\right)$  and  $P(B - \mathbb{E}[B] \geq -t) < \exp\left(\frac{-t^2}{3\mathbb{E}[B]}\right) = \exp\left(\frac{-t^2}{3\tau}\right)$ , so by the equivalent definition of a sub-Gaussian variable,  $B$  is sub-Gaussian with parameter  $O(\tau) = O\left(\frac{\log(1/\delta)}{\varepsilon^2}\right)$ .  $\square$
